# Supplementary material for: Direct Dispensation of Prenatal Supplements With Iron and Anemia Among Pregnant People
Source: PubMed Central journal article supplement (PMC10474519; doi:10.1001/jamanetworkopen.2023.32100), 2023-09-01
Supplement: jamanetwopen-e2332100-s001.pdf [file jamanetwopen-e2332100-s001.pdf]

## **Data Sharing Statement**

### **Data**

**Data available:** No
